# Supplementary material
Source: publisher figshare collection journal article supplement (https://geolsoc.figshare.com/ndownloader/files/27340150)
Supplement: Supplementary file 1 [file 27340150]

## Sheet: Sheet1
Table S6 Comparison of major- and trace-element data of the studied samples from the Darbut region with greywackes from various tectonic settings.
Clastic rocks	Major						Trace
	TiO2	Al2O3	Fe2O3	MgO	K2O/Na2O	Al2O3/(CaO+Na2O)	Th	Hf	Ti/Zr	La	Ce	∑REE	La/Yb	(La/Yb)N	LREE/HREE	δEu
greywacks from various tectonic setting(Bhatia, 1983;1985)
Oceanic island arc	1.06	17.11	1.95	3.65	0.39	1.72	2.27±0.70	2.10±0.60	56.80±21.40	8.00±1.70	19±3.7	58±10	4.2±1.3	2.8±0.9	3.8±0.9	1.04±0.11
Continental island arc	0.64	14.04	1.43	1.97	0.61	2.42	11.10±1.10	6.30±2.00	19.70±4.30	27.00±14.50	59±8.2	146±20	11±3.6	7.5±2.5	7.7±1.7	0.79±0.13
Active continental margin	0.46	12.89	1.3	1.23	0.99	2.56	18.80±5.00	6.8	15.30±2.40	37	78	186	12.5	8.5	9.1	0.6
Passive margin	0.49	8.41	1.32	1.39	1.6	4.15	16.70±3.50	10.1	6.74±0.90	39	85	210	15.9	10.5	8.5	0.56
Clastic rocks in this study
Xibeikulasi Formation	0.61	16.61	1.85	2.28	0.65	1.97	6.55±0.88	4.12±0.65	27.12±4.67	19.1±3.1	33.75±4.45	93.31±11.69	11.53±1.12	8.27±0.8	7.52±0.67	0.98±0.08
Baogutu Formation	0.69	16.05	1.74	1.41	0.75	2.44	7.81±3.39	6.00±2.16	23.35±10.89	23.3±4.5	43.35±9.85	124.10±23.56	10.08±2.43	7.23±1.74	6.58±1.21	0.84+0.1
Tailegula Formation	0.47	14.1	1.42	1.08	0.81	2.53	11.67±5.64	5.84±1.77	16.71±10.69	24.65±5.15	43.15±6.55	119.69±17.38	8.7±1.81	6.24±1.3	5.97±0.85	0.64±0.16
